# Supplementary material for: Preparation of near-infrared laser responsive hydrogels with enhanced laser marking performance
Source: Royal Society of Chemistry journal article supplement (doi:10.1039/c8sm02635a), 2019-01-01
Supplement: c8sm02635a1.pdf [file c8sm02635a1.pdf]

## Electronic supplementary information

# Preparation of near-infrared laser responsive hydrogels with enhanced laser marking performance

Zheng Cao<sup>a, b</sup>, Yuyuan Chen<sup>a</sup>, Cheng Zhang<sup>a</sup>, Junfeng Cheng<sup>a, c, \*</sup>, Dun Wu<sup>a</sup>,

Wenzhong Ma<sup>a</sup>, Chunlin Liu<sup>a, c, \*</sup>, Zhisheng Fu<sup>d</sup>

*a- Jiangsu Key Laboratory of Environmentally Friendly Polymeric Materials, School of Materials Science and Engineering, Jiangsu Collaborative Innovation Center of Photovoltaic Science and Engineering, Changzhou University, Changzhou, Jiangsu, 213164, China*

*b- Key Laboratory of Synthetic and Self-Assembly Chemistry for Organic Functional Molecules, Shanghai Institute of Organic Chemistry, Chinese Academy of Sciences, 345 Lingling Road, Shanghai 200032, China*

*c- National Experimental Demonstration Center for Materials Science and Engineering (Changzhou University), Changzhou, 213164, P.R. China*

*d- MOE Key Laboratory of Macromolecular Synthesis and Functionalization, Department of Polymer Science and Engineering, Zhejiang University, Hangzhou 310027, China*

\*Address correspondence to [chunlin301@hotmail.com](mailto:chunlin301@hotmail.com); [junfeng@cczu.edu.cn](mailto:junfeng@cczu.edu.cn)

### **Contents Supporting Information**

*Figure S1. The particle size distribution of the Bi<sub>2</sub>O<sub>3</sub> particles.*

*Figure S2. The  $\Delta E$  values of the laser marked PAM/PS@Bi<sub>2</sub>O<sub>3</sub> hydrogels at different laser current.*

*Figure S3. The  $\Delta E$  values of the laser marked PAM/Bi<sub>2</sub>O<sub>3</sub> and PAM/PS@Bi<sub>2</sub>O<sub>3</sub> hydrogels at different loading content of laser sensitive particles.*

*Table S1. Characteristic TGA data of the pure hydrogel, PAM/2%PS@Bi<sub>2</sub>O<sub>3</sub> hydrogel samples before and after laser marking.*

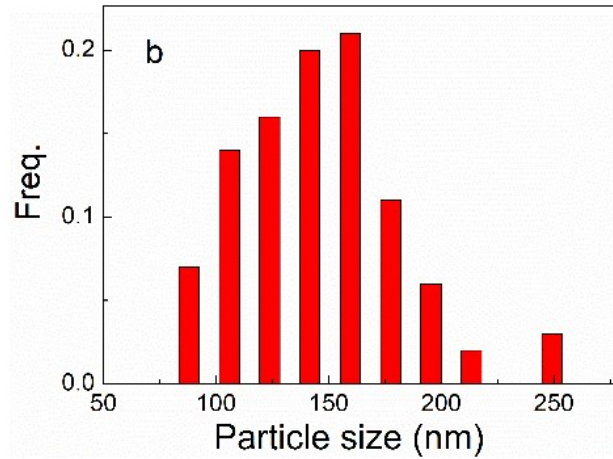

Figure S1. The particle size distribution of the Bi<sub>2</sub>O<sub>3</sub> particles.

In order to quantify the laser marking performance of PAM/PS@Bi<sub>2</sub>O<sub>3</sub> hydrogels, the color differences are introduced using CIE L\*a\*b\* coordinates in our revised manuscript. Color difference can be defined as the numerical comparison of a sample's color to the standard. It indicates the differences in absolute color coordinates and is referred to as Delta ( $\Delta$ ). These formulas calculate the difference between two colors to identify inconsistencies.

Defined by the Commission Internationale de l'Eclairage (CIE), the L\*a\*b\* color space was modeled after a color-opponent theory stating that two colors cannot be red and green at the same time or yellow and blue at the same time. As shown in the equation below, L indicates lightness, a is the red/green coordinate, and b is the yellow/blue coordinate. These values of PAM/PS@Bi<sub>2</sub>O<sub>3</sub> hydrogels before and after laser irradiation can be performed using an X-Rite 7000A spectrometer (X-Rite, USA). Before laser marking, these values can be recorded as L<sub>0</sub>, a<sub>0</sub>, b<sub>0</sub>. After laser marking, these values can be recorded as L<sub>1</sub>, a<sub>1</sub>, b<sub>1</sub>. Deltas for L ( $\Delta L$ ), a ( $\Delta a$ ) and b ( $\Delta b$ ) may be positive (+) or negative (-). The total difference, Delta E ( $\Delta E^*$ ), however, is always positive.

$$\Delta E = \sqrt{\Delta L^2 + \Delta a^2 + \Delta b^2} \quad (1)$$

$\Delta E$  was used to determine the laser marking performance of hydrogels before and after laser marking. The larger the value of  $\Delta E$ , the more obvious the marking contrast.

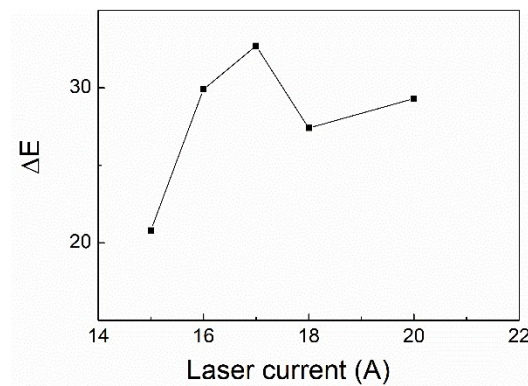

Figure S2. The  $\Delta E$  values of the laser marked PAM/PS@Bi<sub>2</sub>O<sub>3</sub> hydrogels at different laser current.

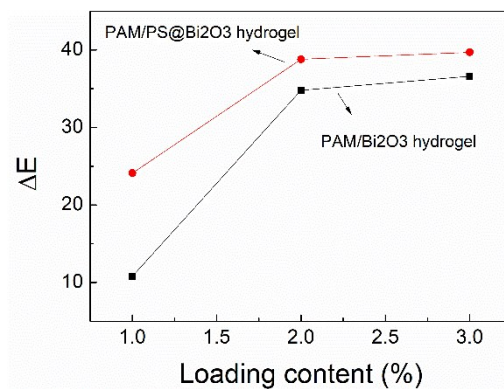

Figure S3. The  $\Delta E$  values of the laser marked PAM/Bi<sub>2</sub>O<sub>3</sub> and PAM/PS@Bi<sub>2</sub>O<sub>3</sub> hydrogels at different loading content of laser sensitive particles.

Table S1. Characteristic TGA data of the pure hydrogel, PAM/2%PS@Bi<sub>2</sub>O<sub>3</sub> hydrogel samples before and after laser marking.

| Samples                                            | Temperature for 5% weight loss T <sub>5%</sub> (°C) | Temperature for the maximum degradation peak T <sub>max</sub> (°C) |
|----------------------------------------------------|-----------------------------------------------------|--------------------------------------------------------------------|
| Unmarked PAM/PS@Bi <sub>2</sub> O <sub>3</sub>     | 181.5                                               | 390.0                                                              |
| Laser marked PAM/PS@Bi <sub>2</sub> O <sub>3</sub> | 104.0                                               | 383.9                                                              |
